# Supplementary material
Source: PubMed Central journal article supplement (PMC2680370)
Supplement: blood-2008-07-171637_1.pdf [file blood-2008-07-171637_1.pdf]

| IPSI-001 ( $\mu\text{M}$ ) | Dexamethasone ( $\mu\text{M}$ ) |     |     |     |
|----------------------------|---------------------------------|-----|-----|-----|
|                            | 1                               | 10  | 25  | 50  |
| 10                         | 1.0                             | 0.9 | 0.7 | 0.7 |
| 25                         | 0.8                             | 0.7 | 0.5 | 0.7 |
| 50                         | 0.9                             | 0.8 | 0.7 | 0.6 |

Combination indices of ANBL-6 cells treated for 48 hours with the indicated concentrations of IPSI-001 and Dex are shown. Data were analyzed using Calcsyn (version 2) software (BioSoft, Milltown, NJ). The combination index (CI) is a quantitative measure of the degree of drug interaction, with a CI less than 1 indicating synergy, a CI of 1 indicating additive effects, and a CI over 1 indicating antagonist.
